# Supplementary material for: EGFR-Targeted Pentacyclic Triterpene Analogues for Glioma Therapy
Source: MDPI journal article supplement (doi:10.3390/ijms222010945), 2021-10-11
Supplement: s1 [file s1]

# Supplementary Material: NMR Data

## EGFR-Targeted Pentacyclic Triterpene Analogues for Glioma Therapy

Halil I. Ciftci<sup>1,2,†</sup>, Mohamed O. Radwan<sup>2,3,†</sup>, Belgin Sever<sup>2,4</sup>, Ahmed K. Hamdy<sup>2,5</sup>, Safiye Emirdağ<sup>6</sup>, N. Gokce Ulusoy<sup>6</sup>, Ece Sozer<sup>6</sup>, Mustafa Can<sup>2,7</sup>, Nurettin Yayli<sup>8</sup>, Norie Araki<sup>9</sup>, Hiroshi Tateishi<sup>2</sup>, Masami Otsuka<sup>1,2</sup>, Mikako Fujita<sup>2,\*</sup> and Mehlika Dilek Altintop<sup>4,\*</sup>

<sup>1</sup> Department of Drug Discovery, Science Farm Ltd., 862-0976 Kumamoto, Japan; hiciftci@kumamoto-u.ac.jp (H.I.C.); motsuka@gpo.kumamoto-u.ac.jp (M.O.)

<sup>2</sup> Medicinal and Biological Chemistry Science Farm Joint Research Laboratory, Faculty of Life Sciences, Kumamoto University, 862-0973 Kumamoto, Japan; htateishi@kumamoto-u.ac.jp (H.T.); mohamedradwan@kumamoto-u.ac.jp (M.O.R.)

<sup>3</sup> Chemistry of Natural Compounds Department, Pharmaceutical and Drug Industries Research Division, National Research Centre, Dokki, 12622 Cairo, Egypt;

<sup>4</sup> Department of Pharmaceutical Chemistry, Faculty of Pharmacy, Anadolu University, 26470 Eskisehir, Turkey; belginsever@anadolu.edu.tr (B.S.)

<sup>5</sup> Department of Medicinal Chemistry, Faculty of Pharmacy, Assiut University, 71526 Assiut, Egypt; ahmed\_alrian88@aun.edu.eg (A.K.H.)

<sup>6</sup> Chemistry Department, Faculty of Science, Ege University, 35040 Izmir, Turkey; sfymrt14@gmail.com (S.E.); ng.ulusoy@gmail.com (N.G.U.); ecozer95@gmail.com (E.S.)

<sup>7</sup> Department of Engineering Sciences, Faculty of Engineering and Architecture, Izmir Katip Celebi University, 35620 Izmir, Turkey; mustafacan80@yahoo.com (M.C.)

<sup>8</sup> Faculty of Pharmacy, Karadeniz Technical University, 61080 Trabzon, Turkey; yayli@ktu.edu.tr (N.Y.)

<sup>9</sup> Department of Tumor Genetics and Biology, Faculty of Life Sciences, Kumamoto University, 860-8556 Kumamoto, Japan; nori@gpo.kumamoto-u.ac.jp (N.A.)

\* Correspondence: mfujita@kumamoto-u.ac.jp (M.F.); mdaltintop@anadolu.edu.tr (M.D.A.); Tel.: +90-222-335-0580 (ext. 3807) (M.D.A.)

† These authors contributed equally to this work.

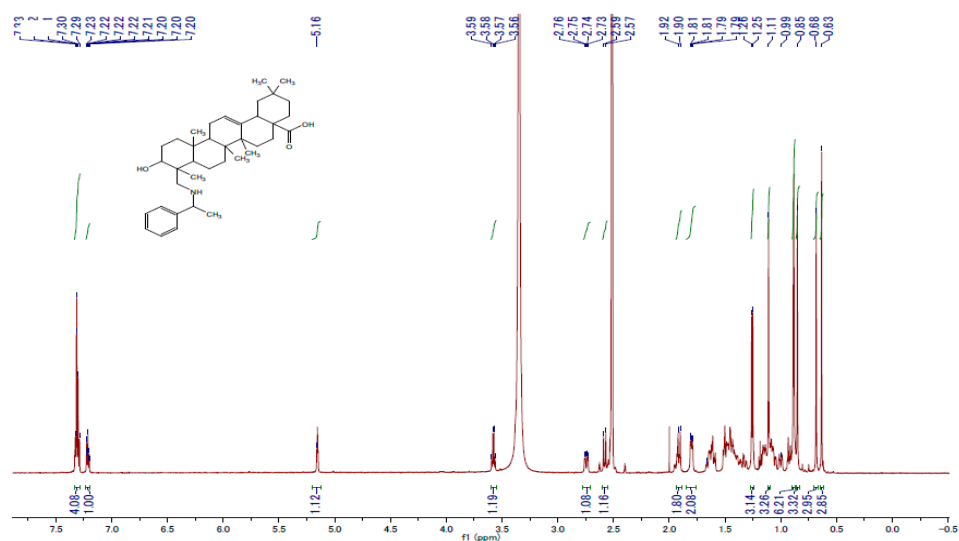

Figure S1: <sup>1</sup>H NMR spectrum of compound 10

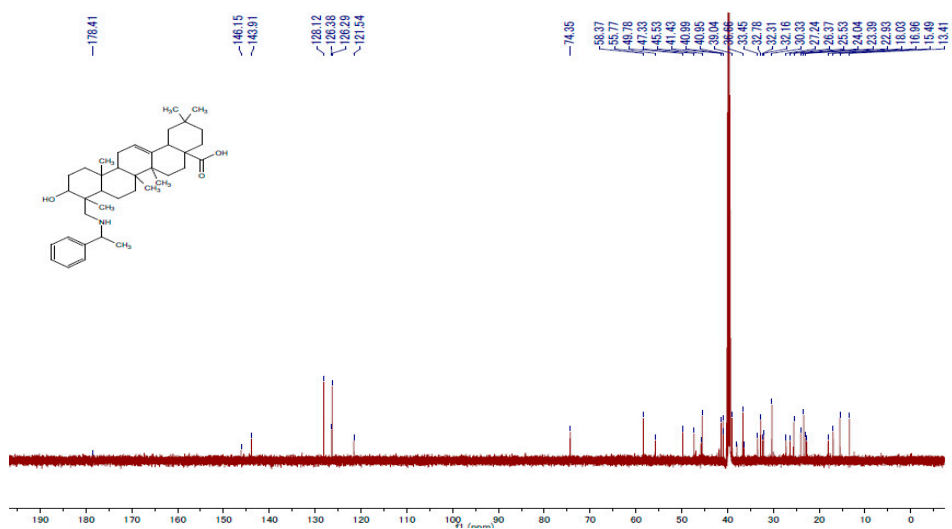

Figure S2: <sup>13</sup>C NMR spectrum of compound 10

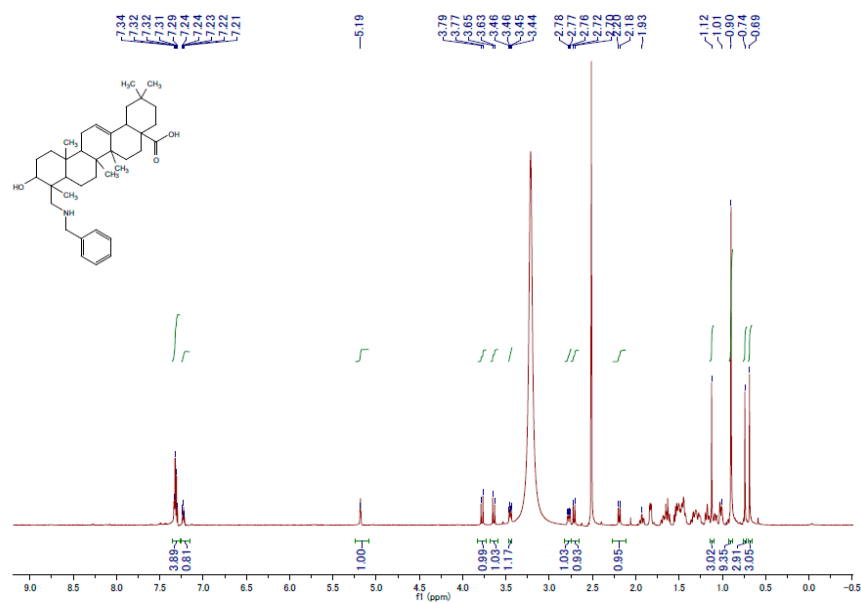

Figure S3: <sup>1</sup>H NMR spectrum of compound 11

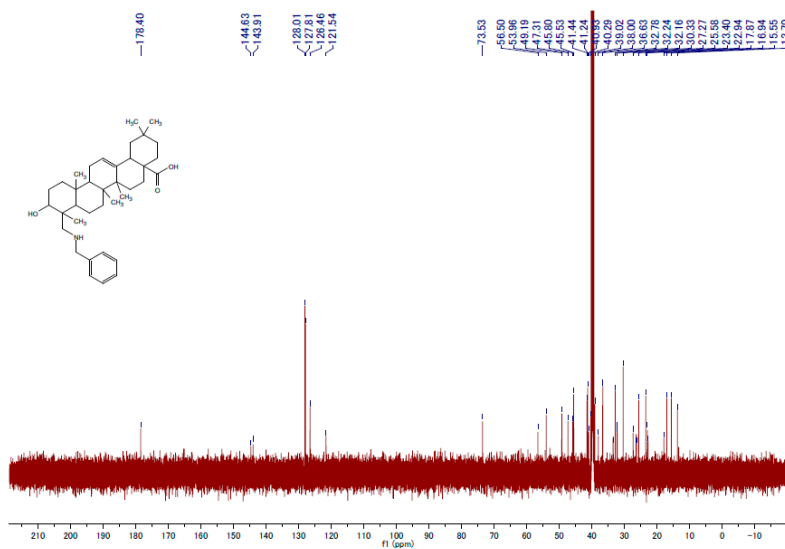

Figure S4: <sup>13</sup>C NMR spectrum of compound 11



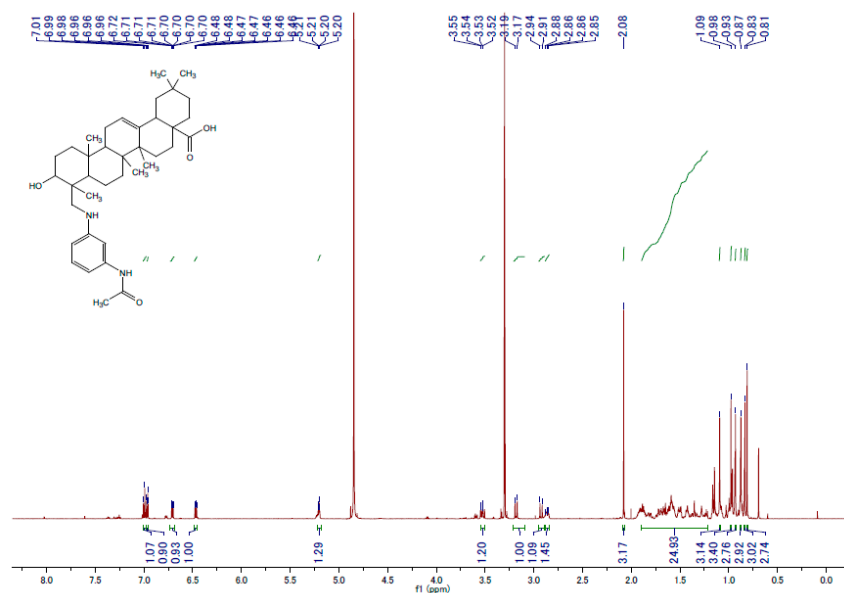

Figure S7:  $^1\text{H}$  NMR spectrum of compound 13

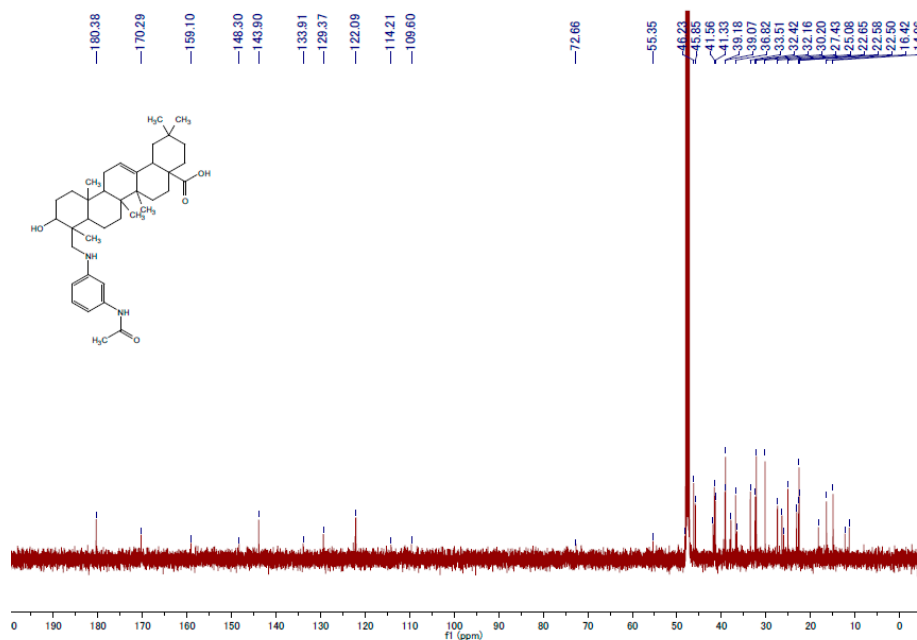

Figure S8:  $^{13}\text{C}$  NMR spectrum of compound 13
